# Supplementary material for: Influence of the acceptor crystallinity on the open-circuit voltage in PTB7-Th: ITIC organic solar cells
Source: Royal Society of Chemistry journal article supplement (doi:10.1039/c9tc05096e), 2019-01-01
Supplement: c9tc05096e1.pdf [file c9tc05096e1.pdf]

## Supporting Information

### Influence of the Acceptor Crystallinity on the Open-Circuit Voltage in PTB7-Th : ITIC Organic Solar Cells

Xiaojing Wang,<sup>1</sup> Yidong Yang,<sup>2</sup> Zhicai He,<sup>\*1</sup> Hongbin Wu<sup>1</sup> and Yong Cao<sup>1</sup>

*1, State Key Laboratory of Luminescent Materials and Devices, Institute of Polymer Optoelectronic Materials and Devices, South China University of Technology, Guangzhou 510640, China, email: zhicaihe@scut.edu.cn*  
*2, School of arts and sciences, University of Rochester, Rochester, NY 14627, USA*

#### S1. The carrier mobility measurement.

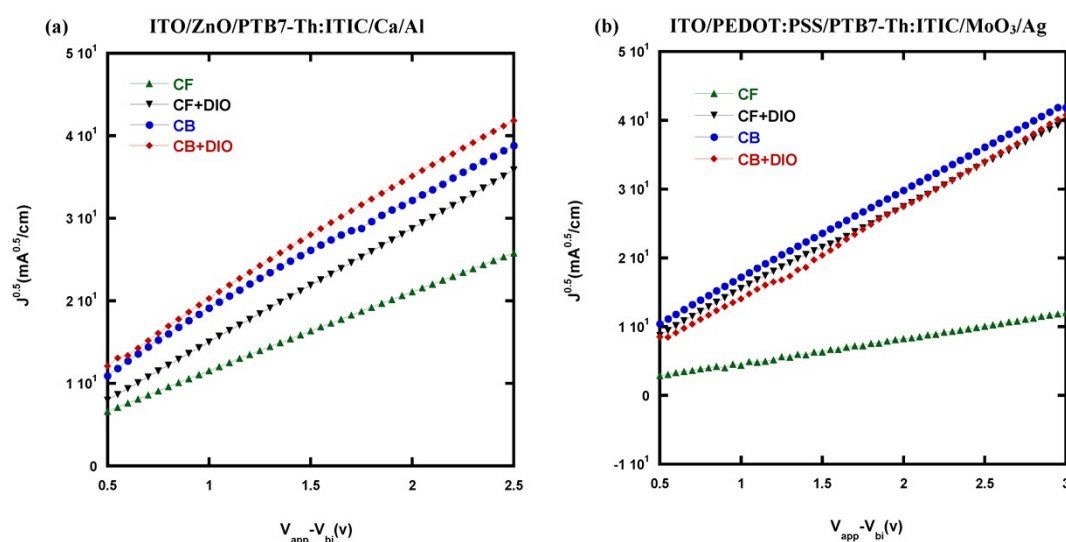

Figure S1. The carrier mobility measurement. (a)  $J^{0.5}$ - $V$  plots for electron-only and (b)  $J^{0.5}$ - $V$  plots for hole-only devices derived from different solvents.

Table S1. The carrier mobility measurement in PTB7-Th: ITIC OSCs with different solvent

| Solvent       | Thickness(nm) | Slope <sup>a</sup> | Slope <sup>b</sup> | Electron<br>Mobility(cm <sup>2</sup> /V/s) | Hole<br>Mobility(cm <sup>2</sup> /V/s) |
|---------------|---------------|--------------------|--------------------|--------------------------------------------|----------------------------------------|
| CF            | 120           | 9.69               | 3.70               | 5.43E-05                                   | 7.90E-06                               |
| CF+DIO(0.6v%) | 120           | 13.97              | 12.67              | 1.13E-04                                   | 9.27E-05                               |
| CB            | 120           | 13.91              | 13.09              | 1.12E-04                                   | 9.89E-05                               |
| CB+DIO(0.6v%) | 120           | 14.26              | 13.16              | 1.17E-04                                   | 9.99E-05                               |

strategies.

<sup>a</sup> The slope of J-V curve in the electron mobility measurement.

<sup>b</sup> The slope of J-V curve in the hole mobility measurement.

## S2. The Transient Photovoltage measurement.

For the Transient Photovoltage (TPV) measurements, a weakened 620 nm laser pulse with a pulse width of 120 fs was used as the light source, which makes the device produce a small transient voltage on the basis of the steady voltage. The measuring equipment was linked to a Tektronix TDS 3052C digitizing oscilloscope in the open-circuit conditions. After filtering the DC signal, we can get the transient photovoltage signal, which is a single exponential decay curve. The decay life time  $\tau$  can be obtained by exponential fitting with the exponential decay formula as following:

$$V = V_0 \exp(-t/\tau) .$$

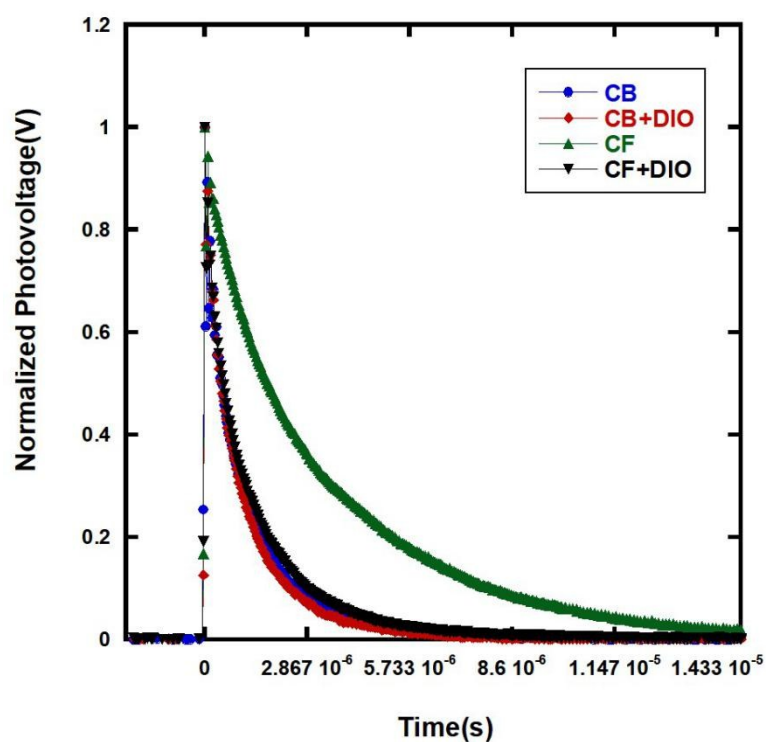

Table S2. The carrier life fitted from Transient Photovoltage Measurement.

| Solvent       | $\tau$ (us) |
|---------------|-------------|
| CB            | 1.65        |
| CB+DIO(0.6v%) | 1.65        |
| CF            | 3.92        |
| CF+DIO(0.6v%) | 2.27        |

### S3. The emission peaks of CT states with different solvents.

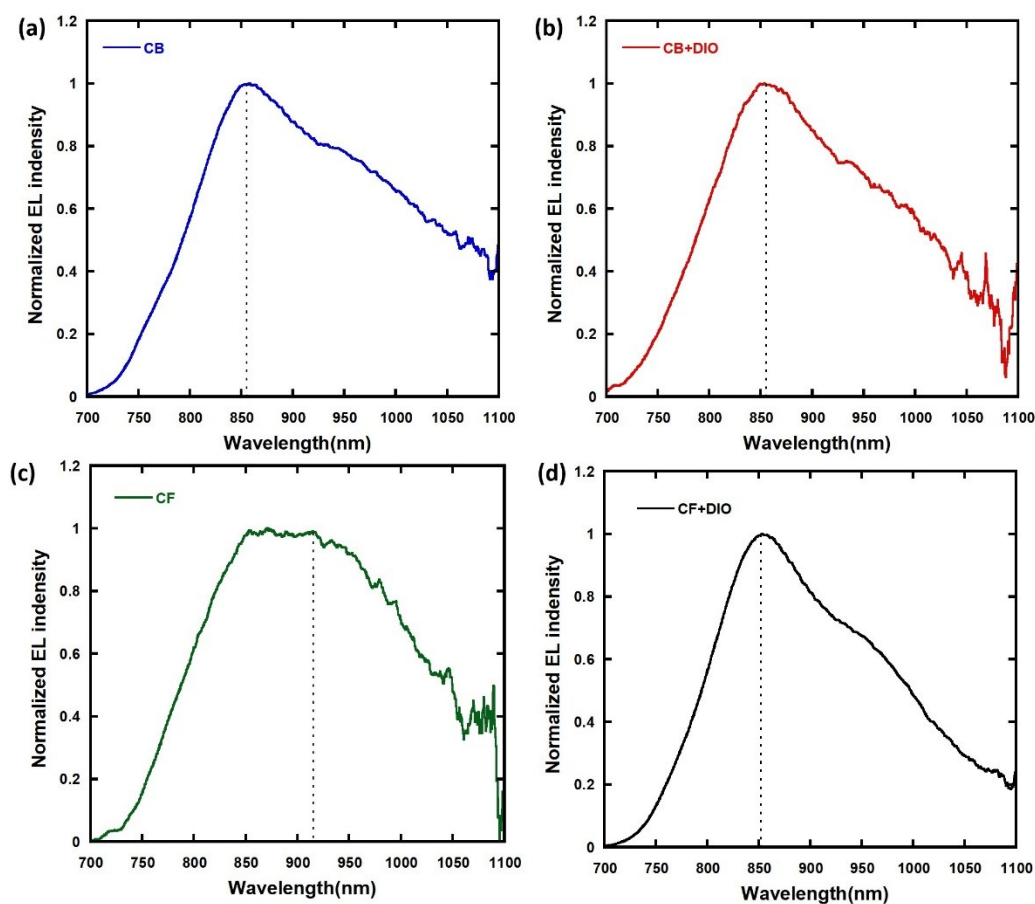

Table S3. The positions of emission peaks and the energy of CT states of the devices with

| Solvent       | $E_{CT}$ (eV) | $\lambda$ (nm) |
|---------------|---------------|----------------|
| CB            | 1.45          | 857            |
| CB+DIO(0.6v%) | 1.45          | 853            |
| CF            | 1.35          | 920            |
| CF+DIO(0.6v%) | 1.46          | 851            |

different solvents.
